# Supplementary material
Source: PubMed Central journal article supplement (PMC5883132)
Supplement: ajtr0010-0907-f9.pdf [file ajtr0010-0907-f9.pdf]

## Arachidonic acid metabolism network in esophageal diseases

**Supplementary Table 1.** DNA sequencing dataset of esophageal cancer from cBioportal

| Cancer type                        | Reference (PMID) | Number of cases | Sequencing method                                                                                                     | Abbreviation in cBioportal |
|------------------------------------|------------------|-----------------|-----------------------------------------------------------------------------------------------------------------------|----------------------------|
| Esophageal squamous cell carcinoma | 24670651         | 88              | Whole-genome sequencing in 17 ESCC cases and whole-exome sequencing in 71 cases                                       | ICGC, Nature 2014          |
| Esophageal squamous cell carcinoma | 24686850         | 139             | Whole exome sequencing or targeted deep sequencing                                                                    | UCLA, Nat Genet 2014       |
| Esophageal adenocarcinoma          | 23525077         | 149             | Whole-exome sequencing of 149 EAC tumor-normal pairs, 15 of which have also been subjected to whole-genome sequencing | Broad, Nat Genet 2013      |
| Esophageal carcinoma               | NA               | 186             | Whole-genome sequencing                                                                                               | TCGA, Provisional          |

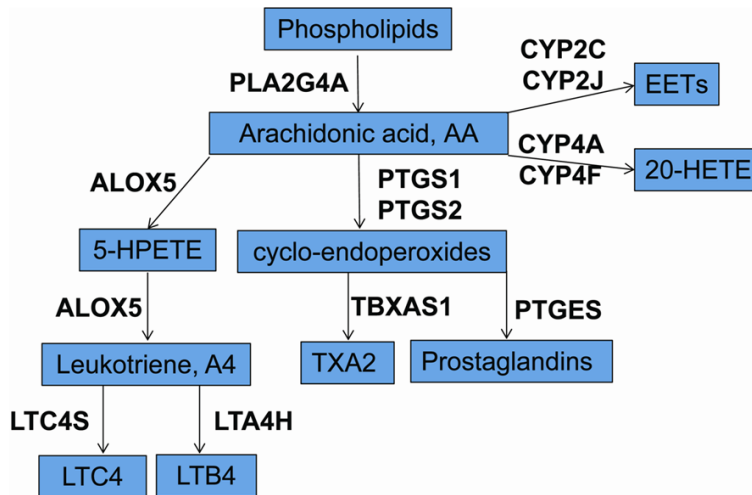

**Supplementary Figure 1.** The arachidonic acid metabolism pathway.

# Arachidonic acid metabolism network in esophageal diseases

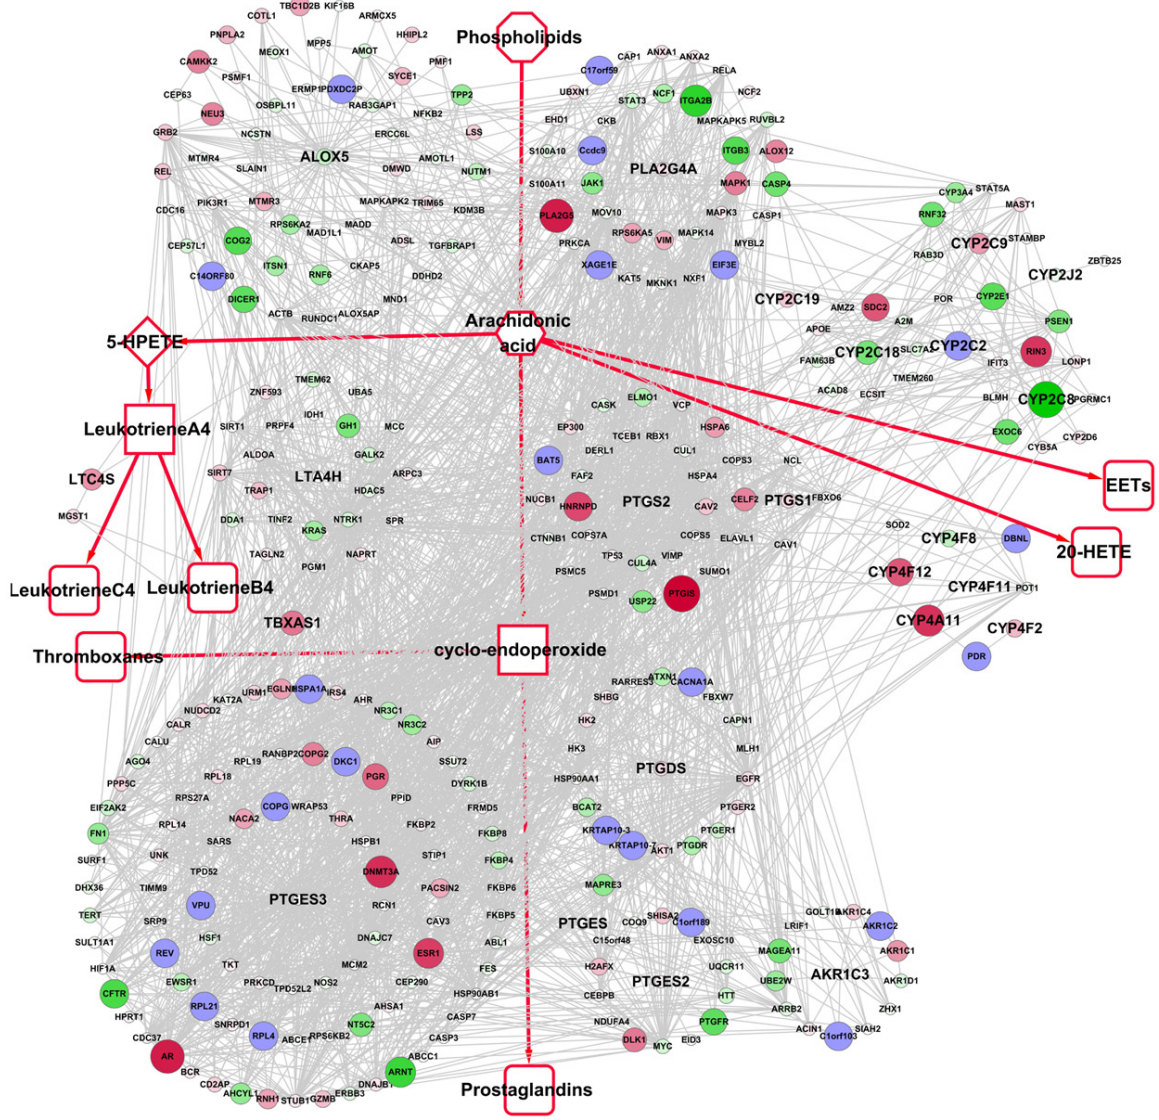

**Supplementary Figure 2.** Expression change and correlation in the AA metabolism PPIN in the GSE9768 dataset after treatment with a mixture of primary bile acids.

**Supplementary Table 2.** Significant SNPs in esophageal cancer reported in the literature

| Gene symbol | Significant SNP | Cancer type                     | PubMed ID |
|-------------|-----------------|---------------------------------|-----------|
| PTGS2       | rs12042763      | 269 cases of ESCC               | 24641411  |
| PLA2G2A     | rs11677         |                                 |           |
|             | rs2236771       |                                 |           |
| PTGS2       | rs3218625       | 1026 cases of ESCC              | 19347867  |
| PTGS2       | -765 G>C        | 1200 cases of esophageal cancer | 19669667  |
| ALOX12      | 261 Arg> Gln    | 1026 cases of ESCC              | 17460548  |

## Arachidonic acid metabolism network in esophageal diseases

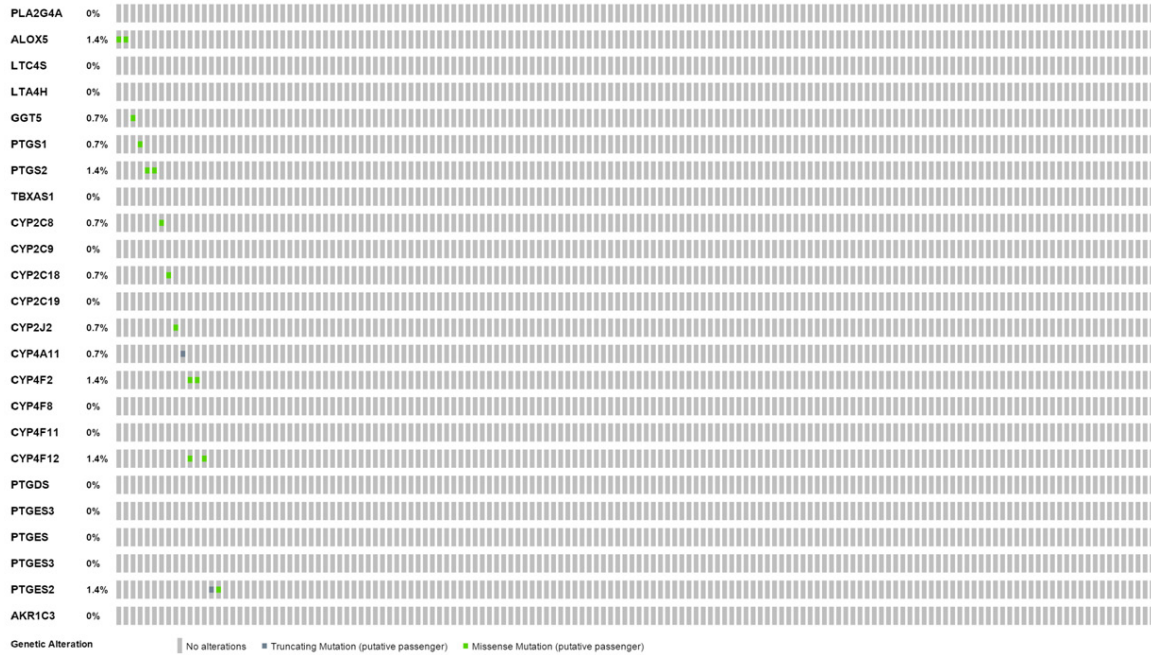

**Supplementary Figure 3.** Mutation rate of key enzymes in arachidonic acid metabolism from the dataset of Broad, Nat Genet 2013. One block presents one clinical case. Gray color means no alterations, brown color means truncating mutation, green color means missense mutation.

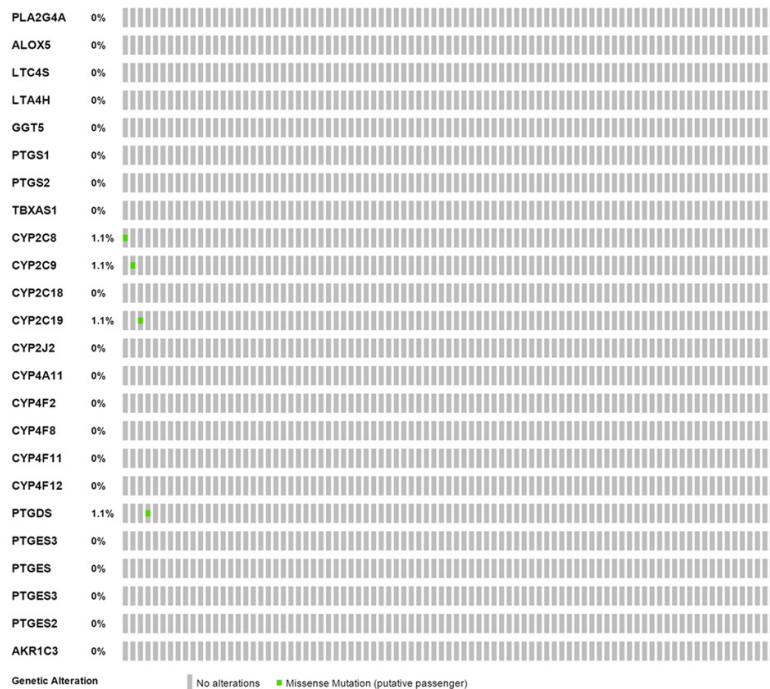

**Supplementary Figure 4.** Mutation rate of key enzymes in arachidonic acid metabolism from the ICGC dataset, Nature 2014. One block presents one clinical case. Gray color means no alterations, green color means missense mutation.

## Arachidonic acid metabolism network in esophageal diseases

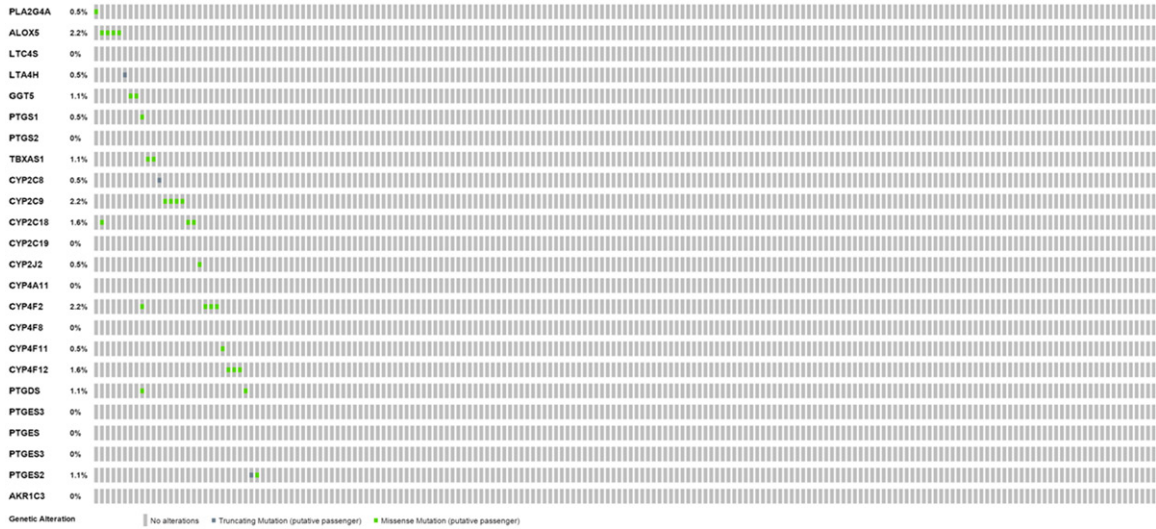

**Supplementary Figure 5.** Mutation rate of key enzymes in arachidonic acid metabolism from the TCGA dataset, Provisional. One block presents one clinical case. Gray color means no alterations, brown color means truncating mutation, green color means missense mutation.

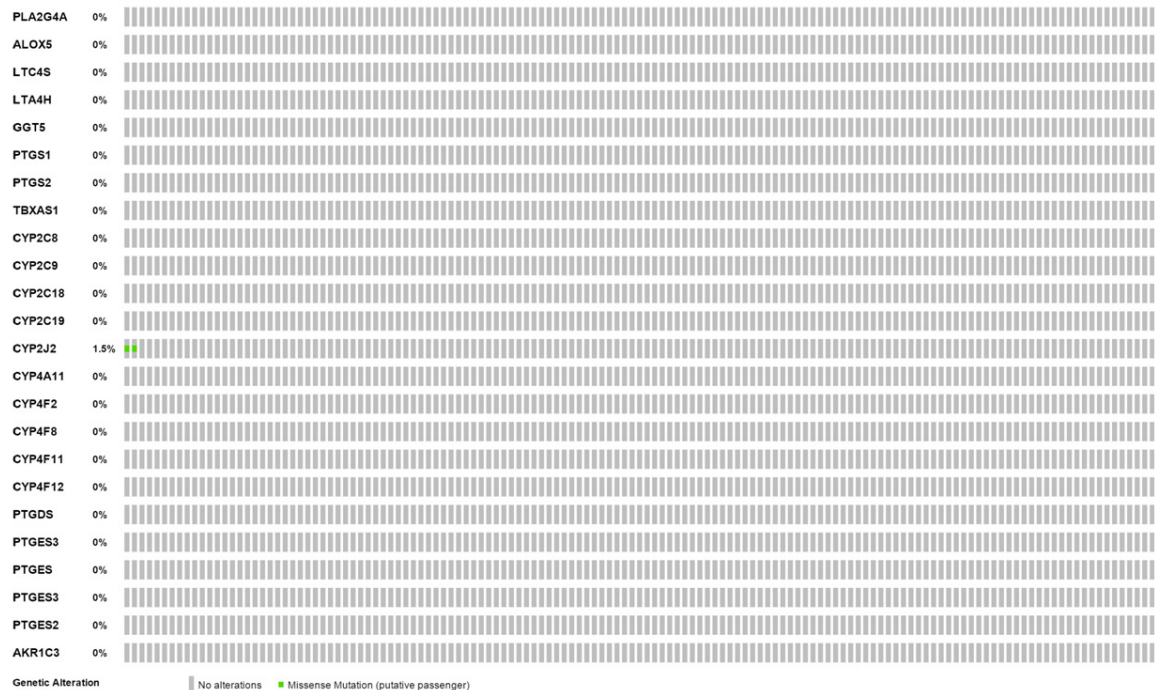

**Supplementary Figure 6.** Mutation rate of key enzymes in arachidonic acid metabolism from the UCLA dataset, Nat Genet 2014. One block presents one clinical case. Gray color means no alterations, green color means missense mutation.
